# Supplementary material for: Use of fecal microbiome to understand the impact of housing conditions on metabolic stress responses in farmed saltwater crocodiles (Crocodylus porosus)
Source: Frontiers journal article supplement (doi:10.3389/fvets.2025.1496946), 2025-02-13
Supplement: Data_Sheet_1.xlsx [file Data_Sheet_1.xlsx]

## Sheet: Supplementary Table 1
Supplementary Table 1. Biomolecule chemical class characterisation.
Group	Hits	Members
Ceramide non-hydroxyfatty acid-sphingosine	82
Amino acids and peptides	28	Creatine; Dimethylglycine; L-Cystathionine; L-Glutamic acid; L-Tyrosine; L-Phenylalanine; L-Alanine; L-Proline; L-Threonine; L-Asparagine; L-Isoleucine; L-Serine; L-Aspartic acid; L-Cystine; Ornithine; Sarcosine; L-Arginine; L-Glutamine; L-Leucine; L-Methionine; L-Homoserine; 4-Hydroxyproline; L-Valine; Citrulline; L-Tryptophan; Methionine sulfoxide; O-Acetylserine; L-Dihydroorotic acid
Hexosylceramide non-hydroxyfatty acid-sphingosine	20
Sulfatide	19
Fatty Acids and Conjugates	18	2-Hydroxybutyric acid; Acetoacetic acid; 2-Ketohexanoic acid; 2-Aminoisobutyric acid; 12-Hydroxydodecanoic acid; 5-Aminopentanoic acid; Chorismate; Gamma-Aminobutyric acid; Aminoadipic acid; Mevalonic acid; Dodecanoic acid; Myristic acid; Aminocaproic acid; (R)-2-Hydroxycaprylic acid; 16-Methylheptadecanoic acid; 12-Methyltridecanoic acid; 2-Hydroxystearic acid; Maleic acid
Monosaccharides	14	D-Xylose; Glyceric acid; N-Acetyl-D-glucosamine; N-Acetylneuraminic acid; Sorbitol; D-Ribose; Galactonic acid; Gluconic acid; L-Threo-2-pentulose; Mannitol; Threonic acid; L-Arabitol; D-Sedoheptulose 7-phosphate; D-Mannose
Free fatty acid	13
Purines	9	Adenine; Adenosine; Deoxyguanosine; Uric acid; Xanthine; Xanthosine; Caffeine; Paraxanthine; 1-Methyladenosine
Pyrimidines	7	Deoxyuridine; Orotic acid; Thymine; Thymidine; Uridine; Uracil; Cytosine
Pyridines	5	4-Pyridoxic acid; Nicotinic acid; Picolinic acid; 6-Hydroxynicotinic acid; Isonicotinic acid
Benzoic acids	5	4-Hydroxybenzoic acid; 2-Aminobenzoic acid; p-Aminobenzoic acid; 3-Hydroxyanthranilic acid; Salicylic acid
Steroids	5	Cortexolone; Aldosterone; Corticosterone; Progesterone; 7 alpha,26-Dihydroxy-4-cholesten-3-one
Phosphatidylcholine	5
Disaccharides	3	Cellobiose; Lactulose; Trehalose
Fatty acid ester of hydroxyl fatty acid	3
Phosphatidylglycerol	3
Phenylacetic acids	2	p-Hydroxyphenylacetic acid; 3-Hydroxyphenylacetic acid
Indoles	2	Indoleacetic acid; Indole-3-carbinol
Benzamides	2	myo-Inositol; Ribitol
Bile acids	2	7-a,25-Dihydroxycholesterol; 7alpha,24S-Dihydroxycholesterol
Lysophophatidylcholine	2
Sphingomyelin	2
Phenols	1	Phenol
Benzenediols	1	L-Dopa
Ether-linked phosphatidylethanolamine	1
Monogalactosyldiacylglycerol	1
Phosphatidylserine	1

## Sheet: Supplementary Table 2
Supplementary Table 2. List of significant biomolecules identified by volcano plot analysis (fold change greater than 2.0 [unitised pen/communal pen] and p-value less than 0.05). Note, dMRM indicates the biomolecule was measred by LC-TQ (CCM metabolites).
Biomolecule	Mass	Mass Error (ppm)	Fold Change	P-value	Regulation (group pen)
FA (18:3)	278.224	1.04	0.4329	0.04135	Downregulated
Cer AP (t18:0/24:2)	679.61	1.97	0.4868	0.01243	Downregulated
HexCer AP (t18:0/16:0)	733.569	2.34	0.4905	0.00848	Downregulated
Cer AP (t41:1)	667.611	1.9	0.4953	0.00647	Downregulated
Cer AP (t18:0/23:1)	667.611	1.9	0.4953	0.00647	Downregulated
FA (22:3)	334.287	0.95	0.3621	0.00589	Downregulated
FA (18:0)	284.272	0.27	0.3752	2e-05	Downregulated
FA (16:0)	256.24	0.28	3.1738	>0.00001	Upregulated
FAHFA (18:0/20:2)	590.525	1.7	2.348	3e-05	Upregulated
FA (18:1)	282.256	0.6	2.156	0.00022	Upregulated
FAHFA (18:1/18:0)	564.512	1.87	2.7674	0.02971	Upregulated
gamma-Aminobutyric acid	dMRM	N/A	2.2722	0.0008	Upregulated
Uridine	dMRM	N/A	3.6532	0.01831	Upregulated
Xanthine	dMRM	N/A	2.7599	0.02413	Upregulated
Hypoxanthine	dMRM	N/A	2.2672	0.0245	Upregulated
2-Deoxyuridine	dMRM	N/A	2.9362	0.03948	Upregulated
(R)-2-Hydroxycaprylic acid	160.11	1.45	0.1187	>0.00001	Downregulated
N-Acetyl-L-glutamic acid	189.064	3.99	2.0698	>0.00001	Upregulated
Isoquinoline N-oxide	145.053	0.85	3.7391	0.00105	Upregulated
DL-Homoserine	dMRM	N/A	2.0766	0.01191	Upregulated
L-Threonine	dMRM	N/A	2.0851	0.01954	Upregulated
Dopamine	dMRM	N/A	0.3835	0.04087	Downregulated

## Sheet: Supplementary Table 3
Supplementary Table 3. Significant biomolecules that result in differences between the single and communal animal pen samples and the preference animal samples collected at the end of the trial.
Biomolecule	Mass	Mass Error (ppm)	f-value	p-value	FDR	Fisher's LSD
FA (16:0)	256.24	0.28	24.588	4.45e-08	1.03e-05	Group > Single; Preference > Single
Ceramide NP (t18:0/24:2)	663.614	3.93	16.966	2.67e-06	0.00031	Single > Group; Single > Preference
FA (18:0)	284.272	0.27	15.242	7.5e-06	0.00058	Group > Single; Preference > Single
FAHFA (18:0/20:2)	590.525	1.7	13.908	1.72e-05	0.000997	Group > Single; Preference > Single
Ceramide AS (d25:2/16:0)	649.6	1.8	12.824	3.45e-05	0.0016	Single > Group; Single > Preference
Ceramide AS (d41:2)	649.6	1.78	12.417	4.51e-05	0.00174	Single > Group; Single > Preference
Ceramide AS d35:1	567.522	1.5	11.627	7.62e-05	0.00253	Single > Group; Single > Preference
FA (18:1)	282.256	0.6	10.844	0.00013	0.00335	Group > Single; Preference > Single
Ceramide NP (t38:0)	611.583	2.91	10.038	0.000228	0.00442	Single > Group; Single > Preference
HexCeramide AP (t18:0/ 23:0)	831.679	2.62	10.035	0.000229	0.00442	Single > Group; Single > Preference
Ceramide AS (d18:1/23:0)	651.616	2.03	9.2426	0.000402	0.00669	Single > Group; Single > Preference
Ceramide ADS (d41:1)	651.616	2.03	9.2365	0.000404	0.00669	Single > Group; Single > Preference
Ceramide ADS (d42:1)	665.632	1.17	8.2027	0.000862	0.0125	Group > Preference; Single > Group; Single > Preference
Ceramide AS (d18:1/24:0)	665.632	1.17	8.1999	0.000864	0.0125	Group > Preference; Single > Group; Single > Preference
Ceramide ADS (d18:0/16:0)	555.522	1.17	7.7167	0.00124	0.0156	Single > Group; Single > Preference
Ceramide NDS (d50:2)	759.745	4.27	7.6827	0.00127	0.0156	Single > Group
Ceramide AS (d18:1/20:0)	609.569	1.88	7.346	0.00165	0.0187	Single > Group; Single > Preference
Ceramide AS (d38:1)	609.569	1.88	7.3116	0.00169	0.0187	Single > Group; Single > Preference
Ceramide AP (t18:0/23:0)	669.626	1.95	6.7327	0.00265	0.0253	Single > Group; Single > Preference
Ceramide NS (d18:1/19:0)	579.558	1.96	6.6916	0.00273	0.0253	Single > Group
Ceramide AP (t18:0/22:0)	655.607	3.65	6.6445	0.00284	0.0253	Single > Group; Single > Preference
Ceramide NS (d18:1/23:0)	635.621	1.85	6.2086	0.004	0.0332	Single > Group; Single > Preference
Ceramide NDS (d52:2)	787.776	4.47	6.0814	0.00443	0.0354	Single > Group
Ceramide AS (d42:1)	665.632	1.17	6.0208	0.00464	0.0359	Single > Group; Single > Preference
Ceramide ADS (d40:1)	637.601	1.34	5.9392	0.00496	0.0359	Single > Group; Single > Preference
Ceramide AS (d18:1/22:0)	637.601	1.34	5.9392	0.00496	0.0359	Single > Group; Single > Preference
Ceramide AS (d18:1/18:0)	581.538	1.42	5.806	0.00552	0.0377	Single > Group; Single > Preference
Ceramide AS (d36:1)	581.538	1.42	5.8059	0.00552	0.0377	Single > Group; Single > Preference
FA (22:3)	334.287	0.95	5.7434	0.0058	0.0385	Single > Group; Single > Preference
Ceramide NS (d18:1/25:1)	661.636	2.59	5.7004	0.00601	0.0387	Single > Group; Single > Preference
FA (19:1)	296.271	0.8	5.5396	0.00684	0.0427	Group > Single; Preference > Single
Ceramide AS (d42:2)	663.617	1.09	5.4298	0.00748	0.0427	Single > Group; Single > Preference
Ceramide AS (d18:1/24:1)	663.617	1.09	5.4273	0.0075	0.0427	Single > Group; Single > Preference
Ceramide AP (t18:0/23:1)	667.611	1.9	5.4205	0.00754	0.0427	Single > Group
Ceramide AP (t41:1)	667.611	1.9	5.4199	0.00755	0.0427	Single > Group
HexCeramide AP (t18:0/22:0)			5.3817	0.007784	0.0442	Single > Group; Single > Preference
FA (22:3)			5.2935	0.008367	0.0464	Single > Group; Single- Preference
Ceramide AS (d18:1/24:2)			5.1908	0.009102	0.0488	Single > Group; Single > Preference
Ceramide AS (d42:3)			5.1751	0.009221	0.0488	Single > Group; Single > Preference
(R)-2-Hydroxycaprylic acid	160.11	1.45	17.513	1.94e-06	0.000216	Single > Group; Single > Preference
N-Acetyl-L-glutamic acid	189.064	3.99	9.1793	0.000421	0.0234	Group > Preference; Group > Single
Isoquinoline N-oxide	145.053	0.85	7.3602	0.00163	0.049	Group > Single
N-Hexadecyl-L-hydroxyproline	355.309	3.68	7.2564	0.00176	0.049	Group > Preference; Single > Preference

## Sheet: Supplementary Table 4
Supplementary Table 4. Metabolic pathways that show significant enrichment resulting in differences between various animal pen samples throughout the trial, as analysed by MetOrigin 2.0 using metabolite and microbiome datasets.
Origin	Pathway	Control vs Single Startled	Group Startled vs Preference	Group vs Group Startled	Single Startled vs Group Startled
Co-metabolism	Purine metabolism	0.045	0.023	0.023	-
	Propanoate metabolism	0.019	-	-	0.048
	Glycolysis / Gluconeogenesis	0.016	-	-	0.04
	Glycerolipid metabolism	0.016	-	-	0.039
	Methane metabolism	0.043	-	-	0.005
	Phenylalanine, tyrosine and tryptophan biosynthesis	-	-	-	0.044
	Thiamine metabolism	-	-	-	0.038
	Monobactam biosynthesis	-	-	-	0.038
	Pyruvate metabolism	-	-	-	0.036
	Novobiocin biosynthesis	-	-	-	0.035
	Pentose and glucuronate interconversions	0.03	-	-	-
	Styrene degradation	-	-	-	0.029
	Glyoxylate and dicarboxylate metabolism	0.029	-	-	-
	Fructose and mannose metabolism	0.028	-	-	-
	Nicotinate and nicotinamide metabolism	0.027	-	-	-
	Glycerophospholipid metabolism	0.026	-	-	-
	Galactose metabolism	0.024	-	-	-
	Inositol phosphate metabolism	0.024	-	-	-
	Biosynthesis of vancomycin group antibiotics	-	-	-	0.022
	Carbon fixation by Calvin cycle	0.011	-	-	-
	Pentose phosphate pathway	-	-	-	0.001
Microbiota	Galactose metabolism	-	0.013	0.013	0.027
	Nicotinate and nicotinamide metabolism	-	-	-	0.029
	Butanoate metabolism	-	-	-	0.026

## Sheet: Supplementary Table 5
Supplementary Table 5. Correlation analysis between metabolites and microbial members (Order) showing differences in animal pen samples throughout the trial, analysed by MetOrigin 2.0 using metabolite and microbiome datasets.
Group	Microbial Order	Enterobacterales		Unknown Clostridia
	Metabolites	R2	p-Value	R2	p-Value
Control vs Single Startled	Dihydroxyacetone phosphate	0.293893	0.0557633	-	-
	Hypoxanthine	0.282776	0.0661589	-	-
	N-Acetylneuraminic acid	-0.0223105	0.887075	-	-
Group Startled vs Preference	Galactonic acid	-0.324211	0.113852	-	-
	Hypoxanthine	0.164997	0.430596	-	-
Group vs Group Startled	Galactonic acid	-0.324211	0.113852	-	-
	Hypoxanthine	0.164997	0.430596	-	-
Single Startled vs Group Startled	4-Guanidobutyric acid	-	-	-0.210913	0.238717
	D-Gluconic acid	-	-	0.20356	0.255865
	Galactonic acid	-	-	-0.0828946	0.646505
	Glyceric acid	-	-	-0.0474639	0.793095
	Lactic acid	-	-	-0.0922537	0.609621
	L-Hydroxyglutaric acid	-	-	-0.0103618	0.954362
	L-Tyrosine	-	-	0.214256	0.231184
	Maleic acid	-	-	-0.0852344	0.637202
	Mevalonic acid	-	-	-0.150414	0.403429

## Sheet: Supplementary Figure 1
Supplementary Figure 1. Overview of the crocodile housing pens used in the stress experiment.

## Sheet: Supplementary Figure 2
Supplementary Figure 3. Identified biomolecules in sampled crocodile faeces.

## Sheet: Supplementary Figure 3
Supplementary Figure 3. (A) Principal component analysis (PCA) and (B) volcano plot analysis of the control crocodile faecal samples and the initial trial samples (i.e., pre-stress test).

## Sheet: Supplementary Figure 4
Supplementary Figure 2. Partial Least Squares-Data Analysis (PLS-DA) score plots of the identified metabolites and lipids from the single animal and group animal pens during the stress trial.
Central Carbon Metabolism (CCM) Metabolites							Polar Metabolites							Non-polar Lipids
R2X = 0.384; R2Y = 0.420; Q2 = 0.055; cross-validation p-value = 0.4588							R2X = 0.714; R2Y = 0.989; Q2 = 0.713; cross-validation p-value < 0.0001							R2X = 0.464; R2Y = 0.808; Q2 = 0.524; cross-validation p-value < 0.0001

## Sheet: Supplementary Figure 5
Supplementary Figure S2. One-way ANNOVA plots of (A) CCM metabolites, (B) polar metabolites, and (C) non-polar lipids.

[truncated: 2 more sheets: Supplementary Figure 6, Supplementary Figure 7]
